# Supplementary material
Source: PubMed Central journal article supplement (PMC1794401)
Supplement: 7601549s3.pdf [file 7601549s3.pdf]

### Supplementary Figure 3

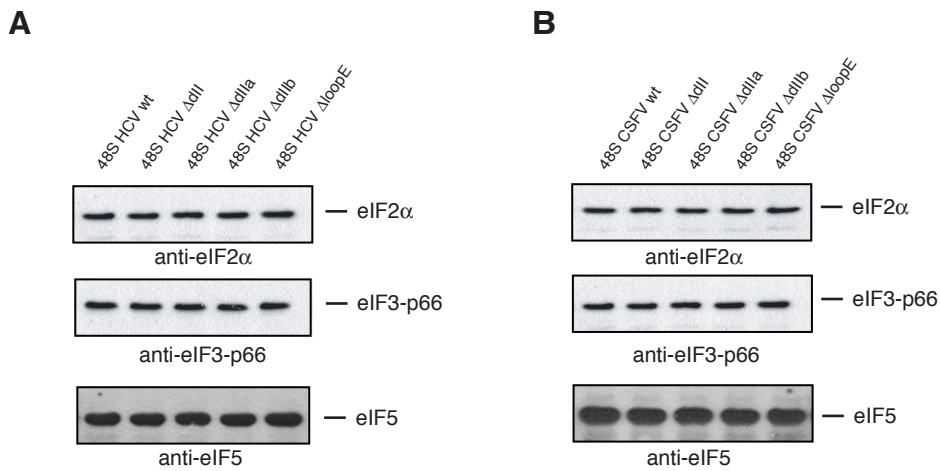

Supplementary Figure 3 Recruitment of eIF2, eIF3 and eIF5 to 48S complexes is unaffected by domain II mutations in HCV and CSFV IRESes. (A, B) The specific mutations of HCV and CSFV IRES RNAs ( $\Delta$ II,  $\Delta$ IIa,  $\Delta$ IIb,  $\Delta$ loopE) are depicted in Figure 1B, C. (A) Detection of eIF2, eIF3 and eIF5 in wt and mutant HCV IRES 48S complexes by immunoblotting with antibodies to eIF2 $\alpha$ , eIF3-p66 and eIF5 respectively. (B) Detection of eIF2, eIF3 and eIF5 in wt and mutant CSFV IRES 48S complexes by immunoblotting with antibodies to eIF2 $\alpha$ , eIF3-p66 and eIF5, respectively.
